# Supplementary material
Source: PubMed Central journal article supplement (PMC8633063)
Supplement: NIHMS1741058-supplement-Supplemental_Digital_Content_2.pdf [file NIHMS1741058-supplement-Supplemental_Digital_Content_2.pdf]

eFigure 1

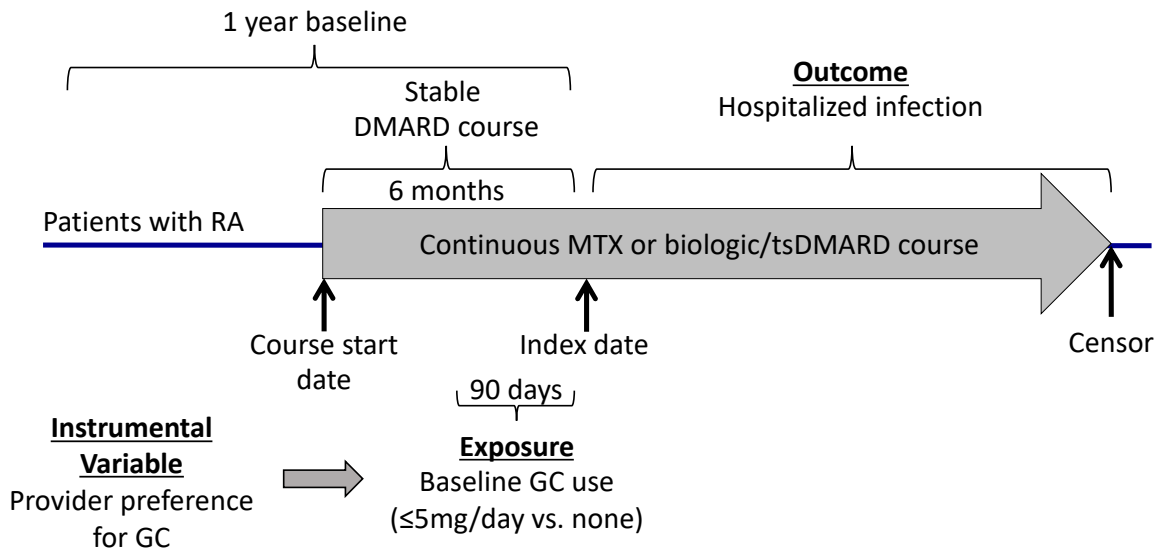

**eTable 1: Codes and Definitions**

| <b>Codes for inclusion criteria</b>                                                                            |                                                                                                                               |                                                                                                  |
|----------------------------------------------------------------------------------------------------------------|-------------------------------------------------------------------------------------------------------------------------------|--------------------------------------------------------------------------------------------------|
| <b>Diagnosis</b>                                                                                               | <b>ICD-9 diagnosis code</b>                                                                                                   | <b>Definition</b>                                                                                |
| RA                                                                                                             | 714.x                                                                                                                         | 2 physician diagnoses at least 7 days apart + DMARD prescription/infusion                        |
| <b>Codes for exclusion criteria</b>                                                                            |                                                                                                                               |                                                                                                  |
| <b>Diagnosis</b>                                                                                               | <b>ICD-9 diagnosis code</b>                                                                                                   | <b>Definition</b>                                                                                |
| Inflammatory bowel disease                                                                                     | 555.x, 556.x                                                                                                                  | 1 physician diagnosis                                                                            |
| Psoriatic Arthritis                                                                                            | 696.0                                                                                                                         | 1 physician diagnosis                                                                            |
| Ankylosing spondylitis                                                                                         | 720.0                                                                                                                         | 1 physician diagnosis                                                                            |
| Systemic lupus erythematosus                                                                                   | 710.0                                                                                                                         | 1 physician diagnosis                                                                            |
| HIV                                                                                                            | 042.xx, V08                                                                                                                   | 1 physician diagnosis                                                                            |
| Malignancy                                                                                                     | 140.x-172.x, 174.x-195.x, 200.x-208.x                                                                                         | 1 physician diagnosis                                                                            |
| <b>Outcomes</b>                                                                                                |                                                                                                                               |                                                                                                  |
| <b>Outcome</b>                                                                                                 | <b>ICD-9 diagnosis code</b>                                                                                                   | <b>Definition</b>                                                                                |
| Hospitalized infection any diagnosis code                                                                      | See Appendix Table 2                                                                                                          | Diagnosis code in any position of discharge diagnoses from an acute care hospitalization         |
| Hospitalized infection principal diagnosis code                                                                | See Appendix Table 2                                                                                                          | Diagnosis code in the primary position of discharge diagnoses from an acute care hospitalization |
| <b>Diagnosis codes and definitions for select covariates (codes for all covariates available upon request)</b> |                                                                                                                               |                                                                                                  |
| <b>Diagnosis</b>                                                                                               | <b>ICD-9 diagnosis code</b>                                                                                                   | <b>Definition</b>                                                                                |
| Diabetes mellitus                                                                                              | 249.x, 250.0-250.9, 357.2, 362.0x, 366.41                                                                                     | 1 inpatient or 2 outpatient diagnosis codes                                                      |
| Obesity                                                                                                        | 278.00, 278.01, V8530, V8531, V8532, V8533, V8534, V8535, V8536, V8537, V8538, V8539, V854, V8541, V8542, V8543, V8544, V8545 | 1 diagnosis code                                                                                 |
| Chronic obstructive pulmonary disease                                                                          | 491.0, 491.1, 491.8, 491.9, 492.0, 492.8, 491.20, 491.21, 491.22, 494.0, 494.1, 496                                           | 1 inpatient or 2 outpatient diagnosis codes                                                      |
| Asthma                                                                                                         | 493.00, 493.01, 493.02, 493.10, 493.11, 493.12, 493.20, 493.21, 493.22, 493.81, 493.82, 493.90, 493.91, 493.92                | 1 inpatient or 2 outpatient diagnosis codes                                                      |
| Extra-articular Rheumatoid Arthritis                                                                           | RA lung disease (714.81), RA carditis (714.2), inflammatory eye disease (364.0, 364.1, 364.3), Felty's syndrome (714.1)       | 1 diagnosis code                                                                                 |

**eTable 2:** Full list of ICD-9 codes to define hospitalized infection

---

032.83, 095.2, 539.01, 539.81, 540.0, 540.1, 540.9, 541, 562.01, 562.03, 562.11, 562.13, 567.0, 567.1, 567.2, 567.21, 567.22, 567.23, 567.29, 567.38, 567.39, 567.8, 567.81, 567.82, 567.89, 567.9, 569.5, 590.2, 039.0, 039.1, 039.2, 039.3, 039.4, 039.8, 039.9, 022.1, 022.8, 022.9, 117.3, 484.6, 020.2, 022.3, 026.0, 026.1, 026.9, 036.2, 036.3, 038.0, 038.1, 038.10, 038.11, 038.12, 038.19, 038.2, 038.3, 038.40, 038.41, 038.42, 038.43, 038.44, 038.49, 038.8, 038.9, 790.7, 116.0, 087.0, 087.1, 087.9, 088.81, 088.82, 324.0, 324.1, 324.9, 023.0, 023.1, 023.2, 023.3, 023.8, 023.9, 112.3, 112.5, 112.82, 112.83, 112.84, 112.85, 078.3, 088.0, 117.2, 046.1, 046.11, 046.19, 114.0, 114.1, 114.2, 114.3, 114.4, 114.5, 114.9, 051.01, 117.5, 996.6, 996.60, 996.61, 996.62, 996.63, 996.64, 996.66, 996.67, 996.68, 996.69, 999.33, 036.1, 046.2, 049.8, 049.9, 054.3, 055.0, 056.01, 058.21, 058.29, 062.0, 062.1, 062.2, 062.3, 062.4, 062.5, 062.8, 062.9, 063.0, 063.1, 063.2, 063.8, 063.9, 064, 066.40, 066.41, 066.42, 066.49, 071, 072.2, 094.81, 323.0, 323.01, 323.02, 323.1, 323.2, 323.4, 323.41, 323.42, 323.61, 484.7, 036.42, 074.22, 093.20, 093.21, 093.22, 093.23, 093.24, 098.84, 112.81, 421.0, 421.1, 421.9, 422.92, 360.00, 360.01, 360.02, 360.03, 360.04, 120.0, 120.1, 120.2, 120.3, 120.9, 121.0, 121.1, 121.2, 121.3, 121.4, 121.5, 121.6, 121.8, 121.9, 122.0, 122.1, 122.2, 122.3, 122.4, 122.5, 122.6, 122.7, 122.8, 122.9, 123.0, 123.1, 123.2, 123.3, 123.4, 123.5, 123.6, 123.8, 123.9, 124, 125.0, 125.1, 125.2, 125.3, 125.4, 125.5, 125.6, 125.7, 125.9, 126.0, 126.1, 126.2, 126.3, 126.8, 126.9, 127.0, 127.1, 127.2, 127.3, 127.4, 127.5, 127.6, 127.7, 127.8, 127.9, 128.0, 128.1, 128.8, 128.9, 129, 133.9, 134.0, 136.21, 001.0, 001.1, 001.9, 002.0, 002.1, 002.2, 002.3, 002.9, 003.0, 003.1, 003.20, 003.21, 003.22, 003.23, 003.24, 003.29, 003.8, 003.9, 004.0, 004.1, 004.2, 004.3, 004.8, 004.9, 005.0, 005.1, 005.2, 005.3, 005.4, 005.8, 005.81, 005.89, 005.9, 006.2, 006.8, 007.0, 007.1, 007.3, 007.4, 007.5, 008.0, 008.00, 008.01, 008.02, 008.03, 008.04, 008.09, 008.1, 008.2, 008.3, 008.41, 008.42, 008.43, 008.44, 008.45, 008.46, 008.47, 008.49, 008.5, 008.6, 008.61, 008.62, 008.63, 008.64, 008.65, 008.66, 008.67, 008.69, 008.8, 009.0, 009.1, 009.2, 009.3, 022.2, 041.41, 041.42, 041.43, 041.49, 006.3, 054.10, 054.11, 054.12, 054.13, 054.19, 054.2, 054.6, 054.71, 054.73, 054.74, 054.79, 054.8, 054.9, 115.00, 115.01, 115.03, 115.04, 115.05, 115.09, 115.10, 115.11, 115.13, 115.14, 115.15, 115.19, 115.90, 115.91, 115.93, 115.94, 115.95, 115.99, 054.40, 054.41, 054.42, 054.43, 054.44, 054.49, 054.72, 066.0, 997.69, 032.81, 077.1, 077.2, 077.3, 077.4, 077.8, 090.3, 117.6, 117.7, 117.8, 117.9, 118, 027.8, 027.9, 030.0, 030.1, 030.2, 030.3, 030.8, 030.9, 100.0, 100.81, 100.89, 100.9, 085.0, 085.1, 085.2, 085.3, 085.4, 085.5, 085.9, 027.0, 084.0, 084.1, 084.2, 084.3, 084.4, 084.5, 084.6, 084.7, 084.8, 084.9, 055.71, 006.5, 036.0, 047.0, 047.1, 047.8, 047.9, 049.0, 049.1, 091.81, 094.2, 098.82, 320.0, 320.1, 320.2, 320.3, 320.7, 320.8, 320.81, 320.82, 320.89, 320.9, 036.43, 074.20, 074.23, 422.0, 422.90, 006.0, 006.9, 024, 025, 027.2, 032.82, 036.40, 036.81, 036.89, 036.9, 037, 040.2, 041.0, 041.00, 041.01, 041.02, 041.03, 041.04, 041.05, 041.09, 041.1, 041.10, 041.11, 041.12, 041.19, 041.2, 041.3, 041.4, 041.5, 041.6, 041.7, 041.8, 041.81, 041.82, 041.83, 041.84, 041.85, 041.89, 041.9, 054.0, 055.79, 055.8, 055.9, 056.00, 056.09, 056.79, 056.8, 056.9, 057.0, 057.8, 057.9, 058.10, 058.11, 058.12, 058.81, 058.82, 058.89, 059.00, 059.01, 059.09, 059.10, 060.1, 060.9, 061, 065.0, 065.1, 065.2, 065.3, 065.4, 065.8, 065.9, 066.1, 066.3, 066.4, 066.8, 066.9, 072.0, 072.3, 072.72, 072.79, 072.8, 072.9, 073.7, 073.8, 073.9, 074.0, 074.1, 074.3, 074.8, 075, 078.4, 078.5, 078.7, 079.0, 079.1, 079.2, 079.3, 079.51, 079.52, 079.8, 088.8, 101, 104.9, 321.0, 321.1, 321.2, 321.3, 321.8, 360.12, 360.13, 360.19, 363.00, 372.00, 372.01, 372.03, 372.04, 375.01, 375.02, 375.31, 375.32, 375.33, 376.11, 376.13, 482.4, 995.91, 995.92, 998.5, 998.59, 031.0, 031.1, 031.2, 031.8, 031.9, 364.03, 364.05, 370.55, 376.03, 730.00, 730.01, 730.02, 730.03, 730.04, 730.05, 730.06, 730.07, 730.08, 730.09, 730.10, 730.11, 730.12, 730.13, 730.14, 730.15, 730.16, 730.17, 730.18, 730.19, 730.20, 730.21, 730.22, 730.23, 730.24, 730.25, 730.26, 730.27, 730.28, 730.29, 730.80, 730.81, 730.82, 730.83, 730.84, 730.85, 730.86, 730.87, 730.88, 730.89, 730.90, 730.91, 730.92, 730.93, 730.94, 730.95, 730.96, 730.97, 730.98, 730.99, 036.41, 074.21, 020.0, 020.1, 020.3, 020.4, 020.5, 020.8, 020.9, 136.3, 079.6, 079.81, 079.82, 079.83, 480.0, 480.1, 480.2, 480.3, 480.8, 480.9, 481, 482.0, 482.1, 482.2, 482.3, 482.30, 482.31, 482.32, 482.39, 482.40, 482.41, 482.42, 482.49, 482.8, 482.81, 482.82, 482.83, 482.84, 482.89, 482.9, 483, 483.0, 483.1, 483.8, 484.3, 484.5, 484.8, 485, 486, 487.0, 487.1, 487.8, 488.01, 488.02, 488.09, 488.1, 488.11, 488.12, 488.19, 488.81, 488.82, 488.89, 494.1, 513.0, 997.31, 997.32, 006.4, 046.3, 098.12, 098.32, 590.00, 590.01, 590.10, 590.11, 590.3, 590.80, 590.81, 590.9, 595.0, 599.0, 996.65, 083.0, 080, 081.0, 081.1, 081.2, 081.9, 082.0, 082.1, 082.2, 082.3, 082.40, 082.41, 082.49, 082.8, 082.9, 083.1, 083.2, 083.8, 083.9, 036.82, 056.71, 098.50, 098.51, 098.52, 098.53, 098.59, 711.00, 711.01, 711.02, 711.03, 711.04, 711.05, 711.06, 711.07, 711.08, 711.09, 711.90, 711.91, 711.92, 711.93, 711.94, 711.95, 711.96, 711.97, 711.98, 711.99, 519.01, 530.86, 536.41, 596.81, 006.6, 022.0, 027.1, 032.85, 035, 040.0, 040.1, 040.3, 040.42, 040.81, 040.82, 040.89, 376.01, 569.61, 597.0, 597.80, 597.89, 680.0, 680.1, 680.2, 680.3, 680.4, 680.5, 680.6, 680.7, 680.8, 680.9, 681.00, 681.01, 681.02, 681.10, 681.11, 681.9, 682.0, 682.1, 682.2, 682.3, 682.4, 682.5, 682.6, 682.7, 682.8, 682.9, 683, 684, 685.0, 686.8, 686.9, 785.4, 997.62, 998.51, 117.1, 091.0, 091.1, 091.2, 091.3, 091.4, 091.50, 091.51, 091.52, 091.61, 091.62, 091.69, 091.7, 091.82, 091.89, 091.9, 092.0, 092.9, 093.0, 093.1, 093.81, 093.82, 093.89, 093.9, 094.0, 094.1, 094.3, 094.82, 094.83, 094.84, 094.85, 094.86, 094.87, 094.89, 094.9, 095.0, 095.1, 095.3, 095.4, 095.5, 095.6, 095.7, 095.8,

---

---

095.9, 096, 097.0, 097.1, 097.9, 098.0, 098.10, 098.11, 098.13, 098.14, 098.15, 098.16, 098.17, 098.19, 098.2, 098.30, 098.31, 098.33, 098.34, 098.35, 098.36, 098.37, 098.39, 098.40, 098.41, 098.42, 098.43, 098.49, 098.6, 098.7, 098.81, 098.83, 098.85, 098.86, 098.89, 099.0, 099.1, 099.2, 099.4, 099.40, 099.41, 099.49, 099.50, 099.51, 099.52, 099.53, 099.54, 099.55, 099.56, 099.59, 099.8, 099.9, 130.0, 130.3, 130.4, 130.5, 130.7, 130.8, 130.9, 086.0, 086.1, 086.2, 086.3, 086.4, 086.5, 086.9, 010.00, 010.01, 010.02, 010.03, 010.04, 010.05, 010.06, 010.10, 010.11, 010.12, 010.13, 010.14, 010.15, 010.16, 010.80, 010.81, 010.82, 010.83, 010.84, 010.85, 010.86, 010.90, 010.91, 010.92, 010.93, 010.94, 010.95, 010.96, 011.00, 011.01, 011.02, 011.03, 011.04, 011.05, 011.06, 011.10, 011.11, 011.12, 011.13, 011.14, 011.15, 011.16, 011.20, 011.21, 011.22, 011.23, 011.24, 011.25, 011.26, 011.30, 011.31, 011.32, 011.33, 011.34, 011.35, 011.36, 011.40, 011.41, 011.42, 011.43, 011.44, 011.45, 011.46, 011.50, 011.51, 011.52, 011.53, 011.54, 011.55, 011.56, 011.60, 011.61, 011.62, 011.63, 011.64, 011.65, 011.66, 011.70, 011.71, 011.72, 011.73, 011.74, 011.75, 011.76, 011.80, 011.81, 011.82, 011.83, 011.84, 011.85, 011.86, 011.90, 011.91, 011.92, 011.93, 011.94, 011.95, 011.96, 012.00, 012.01, 012.02, 012.03, 012.04, 012.05, 012.06, 012.10, 012.11, 012.12, 012.13, 012.14, 012.15, 012.16, 012.20, 012.21, 012.22, 012.23, 012.24, 012.25, 012.26, 012.30, 012.31, 012.32, 012.33, 012.34, 012.35, 012.36, 012.80, 012.81, 012.82, 012.83, 012.84, 012.85, 012.86, 013.00, 013.01, 013.02, 013.03, 013.04, 013.05, 013.06, 013.10, 013.11, 013.12, 013.13, 013.14, 013.15, 013.16, 013.20, 013.21, 013.22, 013.23, 013.24, 013.25, 013.26, 013.30, 013.31, 013.32, 013.33, 013.34, 013.35, 013.36, 013.40, 013.41, 013.42, 013.43, 013.44, 013.45, 013.46, 013.50, 013.51, 013.52, 013.53, 013.54, 013.55, 013.56, 013.60, 013.61, 013.62, 013.63, 013.64, 013.65, 013.66, 013.80, 013.81, 013.82, 013.83, 013.84, 013.85, 013.86, 013.90, 013.91, 013.92, 013.93, 013.94, 013.95, 013.96, 014.00, 014.01, 014.02, 014.03, 014.04, 014.05, 014.06, 014.80, 014.81, 014.82, 014.83, 014.84, 014.85, 014.86, 015.00, 015.01, 015.02, 015.03, 015.04, 015.05, 015.06, 015.10, 015.11, 015.12, 015.13, 015.14, 015.15, 015.16, 015.20, 015.21, 015.22, 015.23, 015.24, 015.25, 015.26, 015.50, 015.51, 015.52, 015.53, 015.54, 015.55, 015.56, 015.60, 015.61, 015.62, 015.63, 015.64, 015.65, 015.66, 015.70, 015.71, 015.72, 015.73, 015.74, 015.75, 015.76, 015.80, 015.81, 015.82, 015.83, 015.84, 015.85, 015.86, 015.90, 015.91, 015.92, 015.93, 015.94, 015.95, 015.96, 016.00, 016.01, 016.02, 016.03, 016.04, 016.05, 016.06, 016.10, 016.11, 016.12, 016.13, 016.14, 016.15, 016.16, 016.20, 016.21, 016.22, 016.23, 016.24, 016.25, 016.26, 016.30, 016.31, 016.32, 016.33, 016.34, 016.35, 016.36, 016.40, 016.41, 016.42, 016.43, 016.44, 016.45, 016.46, 016.50, 016.51, 016.52, 016.53, 016.54, 016.55, 016.56, 016.60, 016.61, 016.62, 016.63, 016.64, 016.65, 016.66, 016.70, 016.71, 016.72, 016.73, 016.74, 016.75, 016.76, 016.90, 016.91, 016.92, 016.93, 016.94, 016.95, 016.96, 017.00, 017.01, 017.02, 017.03, 017.04, 017.05, 017.06, 017.10, 017.11, 017.12, 017.13, 017.14, 017.15, 017.16, 017.20, 017.21, 017.22, 017.23, 017.24, 017.25, 017.26, 017.30, 017.31, 017.32, 017.33, 017.34, 017.35, 017.36, 017.40, 017.41, 017.42, 017.43, 017.44, 017.45, 017.46, 017.50, 017.51, 017.52, 017.53, 017.54, 017.55, 017.56, 017.60, 017.61, 017.62, 017.63, 017.64, 017.65, 017.66, 017.70, 017.71, 017.72, 017.73, 017.74, 017.75, 017.76, 017.80, 017.81, 017.82, 017.83, 017.84, 017.85, 017.86, 017.90, 017.91, 017.92, 017.93, 017.94, 017.95, 017.96, 018.00, 018.01, 018.02, 018.03, 018.04, 018.05, 018.06, 018.80, 018.81, 018.82, 018.83, 018.84, 018.85, 018.86, 018.90, 018.91, 018.92, 018.93, 018.94, 018.95, 018.96, 647.3, 647.30, 647.31, 647.32, 647.33, 647.34, 021.0, 021.1, 021.2, 021.3, 021.8, 021.9, 032.1, 032.2, 032.3, 033.0, 033.1, 033.8, 033.9, 034.0, 034.1, 460, 461.0, 461.1, 461.2, 461.3, 461.8, 461.9, 462, 463, 464.0, 464.00, 464.01, 464.10, 464.11, 464.20, 464.21, 464.30, 464.31, 464.4, 464.50, 464.51, 465.0, 465.8, 465.9, 466.0, 466.1, 466.11, 466.19, 475, 072.71, 790.8, 053.0, 053.10, 053.11, 053.12, 053.13, 053.14, 053.19, 053.20, 053.21, 053.22, 053.29, 053.71, 053.79, 053.8, 053.9

---

## Appendix Methods

### *Defining the instrumental variable*

To define the instrumental variable (IV), a large cohort of patients with rheumatoid arthritis (RA) who were new or prevalent users of disease-modifying anti-rheumatic drugs (DMARDs) was used to estimate and evaluate different definitions of each rheumatologist's "provider preference for glucocorticoids" based on how frequently each provider's patients were treated with glucocorticoids relative to other providers. We defined the IV in this larger cohort (as opposed to the smaller cohort on stable DMARD therapy in which the IV was applied) to ensure that each provider saw enough qualifying patients to accurately determine the provider's preference for glucocorticoids. In each calendar year, we identified patients with  $\geq 2$  diagnoses for RA (714.x)  $\geq 7$  days apart who either 1) filled a prescription or received an infusion of a biologic or janus kinase inhibitor (JAKi) or 2) filled a prescription for methotrexate and received no biologics or JAKi during that year. We excluded patients with diagnoses of psoriatic arthritis, ankylosing spondylitis, inflammatory bowel disease, or systemic lupus erythematosus during that calendar year and required that patients have  $\geq 180$  days of available follow up after the first DMARD prescription or infusion. Patients could contribute observations to each qualifying calendar year.

We assessed four pre-specified definitions of glucocorticoid use based on filled prescriptions of oral prednisone, prednisolone, or methylprednisolone: a) filling any glucocorticoid prescription within 90 days of the first biologic/JAKi prescription or infusion or first methotrexate prescription of the year (for patients not receiving biologics or JAKi) for both new and prevalent users, b) filling  $\geq 30$  day supply of glucocorticoids within 90 days of the first

biologic/JAKi prescription or infusion or methotrexate prescription of the year, c) filling any glucocorticoid prescription 91-180 days after the first biologic/JAKi prescription or infusion or methotrexate prescription of the year, or d) filling  $\geq 30$  day supply of glucocorticoids 91-180 days after the first biologic/JAKi prescription or infusion or methotrexate prescription of the year.

For each patient, we identified the treating rheumatologist using the National Provider Index (NPI) number from the most recent rheumatology outpatient visit (Medicare provider type 66) which occurred prior to the first biologic/JAKi or methotrexate prescription of the year and included an RA diagnosis. We then defined each individual rheumatologist's preference for glucocorticoids for any year in which they treated at least 10 qualifying RA patients in that year (to enable stable preference estimates).

Two different pre-specified definitions of provider preference were created. First, provider preference for glucocorticoids was defined as the proportion of a provider's patients receiving glucocorticoids within each calendar year. Then, to account for differences in case mix, an observed/expected measure of provider preference was created. To do this, a logistic regression model was created with glucocorticoid use as the outcome and covariates including age; sex; race; calendar year; type of DMARD; receipt of a new biologic/JAKi, methotrexate, or other csDMARD in the preceding 3 months (capturing new versus prevalent use); Charlson comorbidity score and each individual component comorbidity from the preceding year (including COPD). The coefficients from this model were then used to calculate the predicted probability of glucocorticoid use for each patient based on this patient's characteristics. The number of a provider's patients expected to receive glucocorticoids was the sum of the

predicted probabilities of glucocorticoid use for each of the provider's patients in each calendar year. The observed/expected measure of provider preference was the actual (observed) number of the provider's patients receiving glucocorticoids in each calendar year divided by the expected number. This process was repeated for each of the four glucocorticoid definitions resulting in 8 different potential instrumental variable measures of provider preference for glucocorticoids.

For each patient in the smaller, analytic cohort (patients with RA on stable DMARD therapy), the provider preference for glucocorticoids for a patient's rheumatologist was obtained from the larger cohort after subtracting out the contribution of the patient of interest to ensure patients were not contributing to their own provider preference measure and to avoid overfitting.

To select an instrumental variable, we assessed univariate associations between each of the eight potential instrumental variables (as continuous measures) and glucocorticoid use at baseline in our cohort of patients on stable DMARD therapy using ANOVA, comparing F-statistics and  $r^2$  values. The best performing instrumental variable was an observed/expected measure of provider preference with glucocorticoid use defined as  $\geq 30$  days of glucocorticoids within 90 days of the first biologic/JAKi or methotrexate prescription of the calendar year (see Appendix Table 3), and this was selected as the instrumental variable for subsequent analysis.

**eTable 3: Performance of different potential instrumental variable definitions**

| Candidate instrumental variable measure definition                        |                                                 | R <sup>2</sup> | F       |
|---------------------------------------------------------------------------|-------------------------------------------------|----------------|---------|
| Provider preference method                                                | Glucocorticoid exposure definition <sup>a</sup> |                |         |
| Proportion of provider's patients receiving glucocorticoids               | Any GC Rx within 90 days                        | .0268          | 4497.04 |
|                                                                           | Any GC Rx at 91-180 days                        | .0244          | 4098.62 |
|                                                                           | ≥30 days of GC within 90 days                   | .0275          | 4620.64 |
|                                                                           | ≥30 days of GC at 91-180 days                   | .0270          | 4531.60 |
| Observed/Expected number of provider's patients receiving glucocorticoids | Any GC Rx within 90 days                        | .0278          | 4675.27 |
|                                                                           | Any GC Rx at 91-180 days                        | .0254          | 4258.25 |
|                                                                           | ≥30 days of GC within 90 days                   | .0284          | 4779.02 |
|                                                                           | ≥30 days of GC at 91-180 days                   | .0274          | 4609.03 |

Results from separate univariate ANOVA models with glucocorticoid use in the analytic cohort as the dependent variable and the candidate instrumental variable measure as the independent variable. Gray cells show the definition chosen as the instrumental variable for subsequent analysis.

<sup>a</sup>The time-frame for glucocorticoid exposure was either 1-90 days or 91-180 days after the first methotrexate or biologic/janus kinase inhibitor prescription or infusion of the year, regardless of whether patients were new or prevalent users.

GC = glucocorticoid



**eTable 4: Full cohort characteristics by exposure level or by instrumental variable status**

|                             | Comparisons by Exposure           |                                           |        | Comparisons by Instrumental Variable |                       |               |
|-----------------------------|-----------------------------------|-------------------------------------------|--------|--------------------------------------|-----------------------|---------------|
|                             | No Glucocorticoids<br>N = 102,143 | Glucocorticoids<br>≤5mg/day<br>N = 61,460 | SMD    | Low IV<br>N = 81,802                 | High IV<br>N = 81,801 | SMD           |
| <b>Demographics/Year</b>    |                                   |                                           |        |                                      |                       |               |
| Age                         |                                   |                                           |        |                                      |                       |               |
| <40                         | 2,453 (2.4%)                      | 1,186 (1.9%)                              | -0.032 | 1,856 (2.3%)                         | 1,783 (2.2%)          | -0.006        |
| 40-45                       | 2,102 (2.1%)                      | 1,113 (1.8%)                              | -0.018 | 1,563 (1.9%)                         | 1,652 (2.0%)          | 0.008         |
| 45-50                       | 3,484 (3.4%)                      | 1,998 (3.3%)                              | -0.009 | 2,654 (3.2%)                         | 2,828 (3.5%)          | 0.012         |
| 50-55                       | 5,499 (5.4%)                      | 3,076 (5.0%)                              | -0.017 | 4,203 (5.1%)                         | 4,372 (5.3%)          | 0.009         |
| 55-60                       | 6,925 (6.8%)                      | 4,031 (6.6%)                              | -0.009 | 5,494 (6.7%)                         | 5,462 (6.7%)          | -0.002        |
| 60-65                       | 7,754 (7.6%)                      | 4,610 (7.5%)                              | -0.003 | 6,152 (7.5%)                         | 6,212 (7.6%)          | 0.003         |
| 65-70                       | 23,014 (22.5%)                    | 12,864 (20.9%)                            | -0.039 | 17,807 (21.8%)                       | 18,071 (22.1%)        | 0.008         |
| 70-75                       | 21,598 (21.1%)                    | 13,155 (21.4%)                            | 0.006  | 17,382 (21.2%)                       | 17,371 (21.2%)        | 0.000         |
| 75-80                       | 15,126 (14.8%)                    | 9,735 (15.8%)                             | 0.029  | 12,497 (15.3%)                       | 12,364 (15.1%)        | -0.005        |
| 80-85                       | 9,204 (9.0%)                      | 6,185 (10.1%)                             | 0.036  | 7,824 (9.6%)                         | 7,565 (9.2%)          | -0.011        |
| ≥85                         | 4,984 (4.9%)                      | 3,507 (5.7%)                              | 0.037  | 4,370 (5.3%)                         | 4,121 (5.0%)          | -0.014        |
| Female                      | 83,599 (81.8%)                    | 49,896 (81.2%)                            | -0.017 | 66,754 (81.6%)                       | 66,741 (81.6%)        | 0.000         |
| Race                        |                                   |                                           |        |                                      |                       |               |
| White                       | 73,289 (71.8%)                    | 44,852 (73.0%)                            | 0.027  | 58,293 (71.3%)                       | 59,848 (73.2%)        | <b>0.042</b>  |
| Black                       | 9,489 (9.3%)                      | 6,058 (9.9%)                              | 0.019  | 7,548 (9.2%)                         | 7,999 (9.8%)          | 0.019         |
| Hispanic                    | 9,442 (9.2%)                      | 5,310 (8.6%)                              | -0.021 | 8,280 (10.1%)                        | 6,472 (7.9%)          | <b>-0.077</b> |
| Other/<br>Unknown           | 9,923 (9.7%)                      | 5,240 (8.5%)                              | -0.041 | 7,681 (9.4%)                         | 7,482 (9.1%)          | -0.008        |
| Year                        |                                   |                                           |        |                                      |                       |               |
| 2007                        | 7,174 (7.0%)                      | 4,213 (6.9%)                              | -0.007 | 5,658 (6.9%)                         | 5,729 (7.0%)          | 0.003         |
| 2008                        | 9,744 (9.5%)                      | 6,253 (10.2%)                             | 0.021  | 7,766 (9.5%)                         | 8,231 (10.1%)         | 0.019         |
| 2009                        | 10,404 (10.2%)                    | 6,194 (10.1%)                             | -0.004 | 8,424 (10.3%)                        | 8,174 (10.0%)         | -0.010        |
| 2010                        | 9,989 (9.8%)                      | 5,997 (9.8%)                              | -0.001 | 7,975 (9.7%)                         | 8,011 (9.8%)          | 0.001         |
| 2011                        | 11,128 (10.9%)                    | 6,851 (11.1%)                             | 0.008  | 9,021 (11.0%)                        | 8,958 (11.0%)         | -0.002        |
| 2012                        | 12,331 (12.1%)                    | 7,482 (12.2%)                             | 0.003  | 9,881 (12.1%)                        | 9,932 (12.1%)         | 0.002         |
| 2013                        | 13,686 (13.4%)                    | 8,123 (13.2%)                             | -0.005 | 10,840 (13.3%)                       | 10,969 (13.4%)        | 0.005         |
| 2014                        | 16,656 (16.3%)                    | 9,706 (15.8%)                             | -0.014 | 13,415 (16.4%)                       | 12,947 (15.8%)        | -0.016        |
| 2015                        | 11,031 (10.8%)                    | 6,641 (10.8%)                             | 0.000  | 8,822 (10.8%)                        | 8,850 (10.8%)         | 0.001         |
| <b>Socioeconomic Status</b> |                                   |                                           |        |                                      |                       |               |
| Dual Eligibility            |                                   |                                           |        |                                      |                       |               |
| None                        | 69,338 (67.9%)                    | 41,707 (67.9%)                            | 0.000  | 55,103 (67.4%)                       | 55,942 (68.4%)        | 0.022         |
| Partial                     | 9,557 (9.4%)                      | 6,089 (9.9%)                              | 0.019  | 7,632 (9.3%)                         | 8,014 (9.8%)          | 0.016         |
| Full                        | 23,248 (22.8%)                    | 13,664 (22.2%)                            | -0.013 | 19,067 (23.3%)                       | 17,845 (21.8%)        | <b>-0.036</b> |
| Quintiles of income         |                                   |                                           |        |                                      |                       |               |

|         |                |                |        |                |                |               |
|---------|----------------|----------------|--------|----------------|----------------|---------------|
| 1st     | 19,857 (19.4%) | 11,865 (19.3%) | -0.003 | 16,042 (19.6%) | 15,680 (19.2%) | -0.011        |
| 2nd     | 20,303 (19.9%) | 12,491 (20.3%) | 0.011  | 16,261 (19.9%) | 16,533 (20.2%) | 0.008         |
| 3rd     | 20,064 (19.6%) | 12,146 (19.8%) | 0.003  | 15,621 (19.1%) | 16,589 (20.3%) | <b>0.030</b>  |
| 4th     | 20,218 (19.8%) | 12,285 (20.0%) | 0.005  | 15,846 (19.4%) | 16,657 (20.4%) | 0.025         |
| 5th     | 19,842 (19.4%) | 11,575 (18.8%) | -0.015 | 16,541 (20.2%) | 14,876 (18.2%) | <b>-0.052</b> |
| Missing | 1,859 (1.8%)   | 1,098 (1.8%)   | -0.003 | 1,491 (1.8%)   | 1,466 (1.8%)   | -0.002        |

**Geography**

Region

|                    |                |                |        |                |                |               |
|--------------------|----------------|----------------|--------|----------------|----------------|---------------|
| East North Central | 15,732 (15.4%) | 9,939 (16.2%)  | 0.021  | 12,793 (15.6%) | 12,878 (15.7%) | 0.003         |
| East South Central | 8,225 (8.1%)   | 5,520 (9.0%)   | 0.033  | 5,953 (7.3%)   | 7,792 (9.5%)   | <b>0.081</b>  |
| Middle Atlantic    | 10,028 (9.8%)  | 5,889 (9.6%)   | -0.008 | 8,533 (10.4%)  | 7,384 (9.0%)   | <b>-0.047</b> |
| Mountain           | 6,499 (6.4%)   | 3,600 (5.9%)   | -0.021 | 5,579 (6.8%)   | 4,520 (5.5%)   | <b>-0.054</b> |
| New England        | 4,563 (4.5%)   | 2,674 (4.4%)   | -0.006 | 3,468 (4.2%)   | 3,769 (4.6%)   | 0.018         |
| Pacific            | 12,897 (12.6%) | 6,519 (10.6%)  | -0.063 | 10,349 (12.7%) | 9,067 (11.1%)  | <b>-0.048</b> |
| South Atlantic     | 21,907 (21.4%) | 13,646 (22.2%) | 0.018  | 17,589 (21.5%) | 17,964 (22.0%) | 0.011         |
| West North Central | 8,518 (8.3%)   | 5,404 (8.8%)   | 0.016  | 6,160 (7.5%)   | 7,762 (9.5%)   | <b>0.070</b>  |
| West South Central | 13,774 (13.5%) | 8,269 (13.5%)  | -0.001 | 11,378 (13.9%) | 10,665 (13.0%) | -0.026        |
| Urban              | 72,776 (71.2%) | 42,984 (69.9%) | -0.029 | 59,589 (72.8%) | 56,171 (68.7%) | <b>-0.092</b> |

**Medications/Treatment**

DMARD

|              |                |                |        |                |                |               |
|--------------|----------------|----------------|--------|----------------|----------------|---------------|
| Methotrexate | 51,459 (50.4%) | 31,618 (51.4%) | 0.021  | 40,052 (49.0%) | 43,025 (52.6%) | <b>0.073</b>  |
| Abatacept    | 9,431 (9.2%)   | 6,261 (10.2%)  | 0.032  | 8,417 (10.3%)  | 7,275 (8.9%)   | <b>-0.047</b> |
| Adalimumab   | 7,844 (7.7%)   | 4,233 (6.9%)   | -0.030 | 6,079 (7.4%)   | 5,998 (7.3%)   | -0.004        |
| Certolizumab | 2,650 (2.6%)   | 1,336 (2.2%)   | -0.028 | 2,226 (2.7%)   | 1,760 (2.2%)   | <b>-0.037</b> |
| Etanercept   | 9,978 (9.8%)   | 5,018 (8.2%)   | -0.056 | 7,403 (9.0%)   | 7,593 (9.3%)   | 0.008         |
| Golimumab    | 1,825 (1.8%)   | 1,068 (1.7%)   | -0.004 | 1,547 (1.9%)   | 1,346 (1.6%)   | -0.019        |
| Infliximab   | 11,427 (11.2%) | 6,566 (10.7%)  | -0.016 | 9,102 (11.1%)  | 8,891 (10.9%)  | -0.008        |
| Rituximab    | 3,800 (3.7%)   | 2,683 (4.4%)   | 0.033  | 3,523 (4.3%)   | 2,960 (3.6%)   | <b>-0.035</b> |
| Tocilizumab  | 2,713 (2.7%)   | 2,029 (3.3%)   | 0.038  | 2,548 (3.1%)   | 2,194 (2.7%)   | <b>-0.026</b> |
| Tofacitinib  | 1,016 (1.0%)   | 648 (1.1%)     | 0.006  | 905 (1.1%)     | 759 (0.9%)     | -0.018        |

Prior biologics

|      |                |                |        |                |                |               |
|------|----------------|----------------|--------|----------------|----------------|---------------|
| None | 66,946 (65.5%) | 38,330 (62.4%) | -0.066 | 51,336 (62.8%) | 53,940 (65.9%) | <b>0.067</b>  |
| 1    | 24,691 (24.2%) | 15,399 (25.1%) | 0.020  | 20,601 (25.2%) | 19,489 (23.8%) | <b>-0.032</b> |
| 2    | 7,439 (7.3%)   | 5,311 (8.6%)   | 0.050  | 6,803 (8.3%)   | 5,947 (7.3%)   | <b>-0.039</b> |
| ≥3   | 3,067 (3.0%)   | 2,420 (3.9%)   | 0.051  | 3,062 (3.7%)   | 2,425 (3.0%)   | <b>-0.043</b> |

Medication use past 3 months

|               |              |              |       |              |              |               |
|---------------|--------------|--------------|-------|--------------|--------------|---------------|
| Sulfasalazine | 4,430 (4.3%) | 2,682 (4.4%) | 0.001 | 4,045 (4.9%) | 3,067 (3.7%) | <b>-0.059</b> |
| Leflunomide   | 5,863 (5.7%) | 4,344 (7.1%) | 0.054 | 5,345 (6.5%) | 4,862 (5.9%) | -0.024        |

|              |                |                |              |                |                |              |
|--------------|----------------|----------------|--------------|----------------|----------------|--------------|
| HCQ          | 15,178 (14.9%) | 10,025 (16.3%) | 0.040        | 12,934 (15.8%) | 12,269 (15.0%) | -0.023       |
| Methotrexate | 70,968 (69.5%) | 44,073 (71.7%) | 0.049        | 56,524 (69.1%) | 58,517 (71.5%) | <b>0.053</b> |
| NSAIDs       | 27,084 (26.5%) | 14,986 (24.4%) | -0.049       | 21,179 (25.9%) | 20,891 (25.5%) | -0.008       |
| Opioids      | 43,114 (42.2%) | 30,690 (49.9%) | <b>0.155</b> | 36,918 (45.1%) | 36,886 (45.1%) | -0.001       |
| PPI          | 31,293 (30.6%) | 21,314 (34.7%) | 0.086        | 26,497 (32.4%) | 26,110 (31.9%) | -0.010       |

#### Comorbid Conditions

|                    |                |                |              |                |                |               |
|--------------------|----------------|----------------|--------------|----------------|----------------|---------------|
| Charlson           | 2 [0-3]        | 2 [0-4]        | 0.086        | 2 [0-4]        | 2 [0-3]        | <b>-0.038</b> |
| Diabetes           | 22,745 (22.3%) | 12,885 (21.0%) | -0.032       | 17,720 (21.7%) | 17,910 (21.9%) | 0.006         |
| Hypertension       | 58,318 (57.1%) | 36,754 (59.8%) | 0.055        | 47,862 (58.5%) | 47,210 (57.7%) | -0.016        |
| CKD                | 7,666 (7.5%)   | 5,409 (8.8%)   | 0.047        | 6,641 (8.1%)   | 6,434 (7.9%)   | -0.009        |
| COPD               | 10,474 (10.3%) | 8,686 (14.1%)  | <b>0.119</b> | 9,661 (11.8%)  | 9,499 (11.6%)  | -0.006        |
| Asthma             | 7,212 (7.1%)   | 5,487 (8.9%)   | 0.069        | 6,698 (8.2%)   | 6,001 (7.3%)   | <b>-0.032</b> |
| CVD                | 2,502 (2.4%)   | 1,658 (2.7%)   | 0.016        | 2,107 (2.6%)   | 2,053 (2.5%)   | -0.004        |
| Obesity            | 10,401 (10.2%) | 6,024 (9.8%)   | -0.013       | 8,425 (10.3%)  | 8,000 (9.8%)   | -0.017        |
| CHF                | 7,822 (7.7%)   | 5,967 (9.7%)   | 0.073        | 6,935 (8.5%)   | 6,854 (8.4%)   | -0.004        |
| CAD                | 19,523 (19.1%) | 12,973 (21.1%) | 0.050        | 16,446 (20.1%) | 16,050 (19.6%) | -0.012        |
| PUD                | 1,900 (1.9%)   | 1,296 (2.1%)   | 0.018        | 1,630 (2.0%)   | 1,566 (1.9%)   | -0.006        |
| Extra-articular RA | 2,374 (2.3%)   | 1,837 (3.0%)   | 0.041        | 2,092 (2.6%)   | 2,119 (2.6%)   | 0.002         |
| Anemia             | 21,882 (21.4%) | 15,308 (24.9%) | 0.083        | 18,853 (23.0%) | 18,337 (22.4%) | -0.015        |
| ESRD               | 229 (0.2%)     | 142 (0.2%)     | 0.001        | 187 (0.2%)     | 184 (0.2%)     | -0.001        |
| MI                 | 739 (0.7%)     | 529 (0.9%)     | 0.015        | 670 (0.8%)     | 598 (0.7%)     | -0.010        |
| Depression         | 17,149 (16.8%) | 11,393 (18.5%) | 0.046        | 14,435 (17.6%) | 14,107 (17.2%) | -0.011        |
| Chronic pain       | 21,520 (21.1%) | 14,283 (23.2%) | 0.052        | 18,448 (22.6%) | 17,355 (21.2%) | <b>-0.032</b> |

#### Healthcare Utilization/Prior Infections

|                                |                |                |               |                |                |               |
|--------------------------------|----------------|----------------|---------------|----------------|----------------|---------------|
| Outpatient visits              | 13 [8-18]      | 14 [9-20]      | <b>0.153</b>  | 13 [9-19]      | 13 [9-19]      | <b>-0.056</b> |
| Rheumatology outpatient visits | 4 [3-6]        | 4 [3-6]        | <b>0.123</b>  | 4 [3-6]        | 4 [3-6]        | <b>-0.068</b> |
| ED visits                      |                |                |               |                |                |               |
| None                           | 67,144 (65.7%) | 35,632 (58.0%) | <b>-0.160</b> | 51,550 (63.0%) | 51,226 (62.6%) | -0.008        |
| 1                              | 20,457 (20.0%) | 13,970 (22.7%) | 0.066         | 17,044 (20.8%) | 17,383 (21.3%) | 0.010         |
| 2                              | 7,614 (7.5%)   | 5,884 (9.6%)   | 0.076         | 6,719 (8.2%)   | 6,779 (8.3%)   | 0.003         |
| ≥3                             | 6,928 (6.8%)   | 5,974 (9.7%)   | <b>0.107</b>  | 6,489 (7.9%)   | 6,413 (7.8%)   | -0.003        |
| Hospitalizations               |                |                |               |                |                |               |
| None                           | 81,201 (79.5%) | 45,515 (74.1%) | <b>-0.129</b> | 63,429 (77.5%) | 63,287 (77.4%) | -0.004        |
| 1                              | 14,023 (13.7%) | 10,194 (16.6%) | 0.080         | 12,109 (14.8%) | 12,108 (14.8%) | 0.000         |
| 2                              | 4,471 (4.4%)   | 3,533 (5.7%)   | 0.063         | 3,981 (4.9%)   | 4,023 (4.9%)   | 0.002         |
| ≥3                             | 2,448 (2.4%)   | 2,218 (3.6%)   | 0.071         | 2,283 (2.8%)   | 2,383 (2.9%)   | 0.007         |
| Hospitalized infection         |                |                |               |                |                |               |
| None                           | 94,331 (92.4%) | 54,780 (89.1%) | <b>-0.111</b> | 74,518 (91.1%) | 74,593 (91.2%) | 0.003         |
| 1                              | 6,081 (6.0%)   | 4,986 (8.1%)   | 0.085         | 5,564 (6.8%)   | 5,503 (6.7%)   | -0.003        |

|                                             |                |                |              |                |                |        |
|---------------------------------------------|----------------|----------------|--------------|----------------|----------------|--------|
| 2                                           | 1,237 (1.2%)   | 1,152 (1.9%)   | 0.054        | 1,210 (1.5%)   | 1,179 (1.4%)   | -0.003 |
| ≥3                                          | 494 (0.5%)     | 542 (0.9%)     | 0.048        | 510 (0.6%)     | 526 (0.6%)     | 0.002  |
| Antibiotics                                 | 30,739 (30.1%) | 22,553 (36.7%) | <b>0.140</b> | 26,914 (32.9%) | 26,378 (32.2%) | -0.014 |
| <b>Durable Medical Equipment/Disability</b> |                |                |              |                |                |        |
| Disability                                  | 43,333 (42.4%) | 25,987 (42.3%) | -0.003       | 34,526 (42.2%) | 34,794 (42.5%) | 0.007  |
| SNF past year                               | 6,664 (6.5%)   | 5,288 (8.6%)   | 0.079        | 5,917 (7.2%)   | 6,035 (7.4%)   | 0.006  |
| <b>Durable Medical Equipment</b>            |                |                |              |                |                |        |
| Walker                                      | 4,325 (4.2%)   | 3,075 (5.0%)   | 0.037        | 3,669 (4.5%)   | 3,731 (4.6%)   | 0.004  |
| Oxygen                                      | 4,608 (4.5%)   | 3,831 (6.2%)   | 0.076        | 4,276 (5.2%)   | 4,163 (5.1%)   | -0.006 |
| Lift                                        | 526 (0.5%)     | 416 (0.7%)     | 0.021        | 468 (0.6%)     | 474 (0.6%)     | 0.001  |
| Wheelchair                                  | 3,683 (3.6%)   | 2,784 (4.5%)   | 0.047        | 3,209 (3.9%)   | 3,258 (4.0%)   | 0.003  |
| Hospital bed                                | 1,409 (1.4%)   | 1,019 (1.7%)   | 0.023        | 1,251 (1.5%)   | 1,177 (1.4%)   | -0.007 |
| Any DME                                     | 12,876 (12.6%) | 9,706 (15.8%)  | 0.091        | 11,340 (13.9%) | 11,242 (13.7%) | -0.003 |
| <b>Preventive Treatment</b>                 |                |                |              |                |                |        |
| <b>Cancer Screening</b>                     |                |                |              |                |                |        |
| Breast cancer                               | 58,938 (57.7%) | 34,256 (55.7%) | -0.040       | 46,884 (57.3%) | 46,310 (56.6%) | -0.014 |
| Colon cancer                                | 46,795 (45.8%) | 28,292 (46.0%) | 0.004        | 37,973 (46.4%) | 37,114 (45.4%) | -0.021 |
| Prostate cancer                             | 13,767 (13.5%) | 8,520 (13.9%)  | 0.011        | 11,188 (13.7%) | 11,099 (13.6%) | -0.003 |
| Cervical cancer                             | 34,711 (34.0%) | 19,503 (31.7%) | -0.048       | 27,367 (33.5%) | 26,847 (32.8%) | -0.013 |
| Lung cancer                                 | 12,967 (12.7%) | 9,735 (15.8%)  | 0.090        | 11,670 (14.3%) | 11,032 (13.5%) | -0.023 |
| <b>Immunizations</b>                        |                |                |              |                |                |        |
| Influenza vaccine (past year)               | 56,829 (55.6%) | 34,612 (56.3%) | 0.014        | 45,735 (55.9%) | 45,706 (55.9%) | -0.001 |
| Pneumococcal vaccine (ever)                 | 29,978 (29.3%) | 18,380 (29.9%) | 0.012        | 24,403 (29.8%) | 23,955 (29.3%) | -0.012 |
| Herpes zoster vaccination (ever)            | 7,456 (7.3%)   | 3,956 (6.4%)   | -0.034       | 5,860 (7.2%)   | 5,552 (6.8%)   | -0.015 |

Mean (standard deviation), N (percent), or median [interquartile range] shown.

Standardized mean differences (SMD) were considered meaningful across the exposure (glucocorticoids) if > 0.1 and across the IV if > 0.026 (0.2 times the complier rate) – these values are bolded.

DMARD = disease-modifying anti-rheumatic drug; HCQ = hydroxychloroquine; NSAIDs = nonsteroidal anti-inflammatory drugs; PPI = proton pump inhibitor; CKD = chronic kidney disease; COPD = chronic obstructive pulmonary disease; CVD = cerebrovascular disease; CHF = congestive heart failure; CAD = coronary artery disease; PUD = peptic ulcer disease; ESRD = end-stage renal disease; MI = myocardial infarction; ED = emergency department; DME = durable medical equipment
